# TRPA1 tunes mosquito thermotaxis to host temperatures

Román A. Corfas<sup>1</sup> and Leslie B. Vosshall<sup>1,2\*</sup>

<sup>1</sup>Laboratory of Neurogenetics and Behavior, The Rockefeller University, 1230 York Avenue, Box 63, New York, NY 10065 USA <sup>2</sup>Howard Hughes Medical Institute

\*for correspondence: [leslie.vosshall@rockefeller.edu](mailto:leslie.vosshall@rockefeller.edu)

## SUMMARY

**While most ectotherms thermotax only to regulate their temperature, female mosquitoes are attracted to human body heat during pursuit of a blood meal. Here we elucidate the basic rules of *Aedes aegypti* thermotaxis and test the function of candidate thermoreceptors in this important behavior. We show that host-seeking mosquitoes are maximally attracted to thermal stimuli approximating host body temperatures, seeking relative warmth while avoiding both relative cooling and stimuli exceeding host body temperature. We found that the cation channel *TRPA1*, in addition to playing a conserved role in thermoregulation and chemosensation, is required for this specialized host-selective thermotaxis in mosquitoes. During host-seeking, *AaegTRPA1*<sup>-/-</sup> mutants failed to avoid stimuli exceeding host temperature, and were unable to discriminate between host-temperature and high-temperature stimuli. *TRPA1*-dependent tuning of thermotaxis is likely critical for mosquitoes host-seeking in a complex thermal environment in which humans are warmer than ambient air, but cooler than surrounding sun-warmed surfaces.**

## INTRODUCTION

Thermotaxis is a sensory-motor behavior that guides animals toward a preferred temperature. This type of sensory navigation allows animals to avoid environments of noxious cold and heat, with the goal of remaining in physiologically suitable ambient temperatures. For ectotherms such as insects, thermotaxis behavior is the primary method of thermoregulation. Many invertebrates are vulnerable to temperature extremes, facing the risk of desiccation at elevated temperatures, and rapid hypothermia at low temperatures. Therefore, mechanisms to detect environmental temperatures and trigger appropriate approach or avoidance behaviors are extremely important for their survival. For instance, adult *C. elegans* worms migrate preferentially towards a specific thermal environment determined by the temperature of their cultivation (Hedgecock and Russell, 1975; Mori and Ohshima, 1995). Adult *Drosophila melanogaster* flies prefer a narrow range of air temperatures around 24-25°C (Sayeed and Benzer, 1996; Hamada et al., 2008) and rapidly avoid air temperatures of ~31°C (Ni et al., 2013).

Interestingly, some hematophagous (blood-feeding) arthropods have evolved a specialized mode of thermotaxis to locate warm-blooded hosts. Such thermophilic behavior is seen in kissing bugs [*Triatoma infestans* (Flores and Lazzari, 1996) and *Rhodnius prolixus* (Schmitz et al., 2000)], the bedbug [*Cimex lectularius* (Rivnai, 1931)], the tick [*Ixodes ricinus* (Lees, 1948)], and many species

of mosquito (Clements, 1999) including *Ae. aegypti*, a major tropical disease-vector (Bhatt et al., 2013). Female *Ae. aegypti* require a vertebrate blood meal for the production of eggs, and finding a suitable warm-blooded host is therefore an essential component of reproduction. Mosquitoes use a variety of physical and chemical senses to locate hosts in their environment (Cardé, 2015). When host-seeking, these animals become strongly attracted to warm inanimate objects, eagerly probing at them as if they were hosts (Howlett, 1910).

In nature, mosquitoes thermotax in a complex thermal landscape in which ambient air temperature, host body temperature, and surrounding surface temperatures can vary widely. For mosquitoes such as *Ae. aegypti*, host-seeking behavior can be activated by an increase in ambient carbon dioxide (CO<sub>2</sub>) (Majeed et al., 2014). This activation elicits flight activity (Eiras and Jepson, 1991; McMeniman et al., 2014), and results in an array of behaviors including attraction to visual stimuli (van Breugel et al., 2015) and host olfactory cues (Dekker et al., 2005; McMeniman et al., 2014), and landing on warm objects (Burgess, 1959; Eiras and Jepson, 1994; Kröber et al., 2010; Maekawa et al., 2011; McMeniman et al., 2014; van Breugel et al., 2015). *Ae. aegypti* flying in a wind tunnel can detect a warmed stimulus from a distance, eliciting attraction and thermotaxis (van Breugel et al., 2015).

What are the mechanisms by which animals detect thermal stimuli, and how might these be adapted for the specialized needs of heat-seeking female mosquitoes? Thermotaxis is typically initiated by thermosensitive neurons that sample environmental temperature to inform navigational decision-making. Such neurons must be equipped with molecular thermosensors capable of detecting and transducing thermal stimuli. Diverse molecular thermoreceptors have been identified in the animal kingdom, many of which are members of the transient receptor potential (TRP) superfamily of ion channels (Barbagallo and Garrity, 2015; Palkar et al., 2015). Different thermosensitive TRPs show distinct tuning spanning the thermal spectrum from noxious cold to noxious heat. Among these is TRPA1, which is a heat sensor in multiple insects, including the vinegar fly *D. melanogaster* and the malaria mosquito *Anopheles gambiae* (Hamada et al., 2008; Wang et al., 2009). Neurons in thermosensitive sensilla (Gingl et al., 2005) of *An. gambiae* female antennae express *TRPA1* (Wang et al., 2009). In *D. melanogaster*, *TRPA1* mutants fail to avoid high air temperature in a thermal gradient. Interestingly, animals such as snakes and vampire bats (Gracheva et al., 2010; Gracheva et al., 2011) have evolved to use thermosensitive TRP channels to locate warm-blooded prey, raising the possibility that *AaegTRPA1* may be used by mosquitoes to find hosts. Recently, a structurally distinct insect thermosensor, *Gr28b*, was identified in *D. melanogaster* (Ni et al., 2013). *Gr28b*, a gustatory receptor paralogue, is expressed in heat-sensitive neurons of *D. melanogaster* aristae and is an important component of thermotaxis during

## TRPA1 tunes mosquito thermotaxis to host temperatures

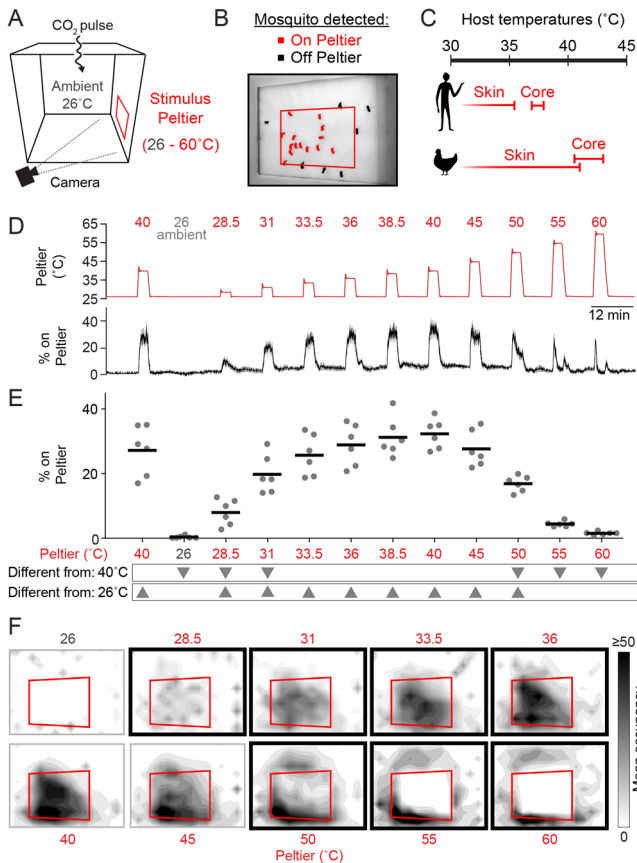

**Figure 1. Mosquitoes thermotax to stimuli approximating host body temperature.** Schematic of heat-seeking assay enclosure (30 x 30 x 30 cm). B, Representative experimental image showing mosquitoes detected on and near the Peltier (red square). C, Typical skin and core temperatures of *Ae. aegypti* hosts, humans and chickens (Richards, 1971; Yao et al., 2008). D-F, Heat-seeking behavior measured for a range of stimuli from 26-60°C (n = 6 trials per condition). Peltier temperature measured by thermocouple (D, top trace, mean in red, s.e.m. in gray) and percent of mosquitoes on Peltier during seconds 90-180 of each stimulus period in (D). Each replicate is indicated by a dot, and mean by a line. Arrowheads indicate significant differences ( $p < 0.05$ ) from the second presentation of the 40°C stimulus or from 26°C (repeated measures one-way ANOVA with Bonferroni correction). F, Heat maps showing mean mosquito occupancy on the Peltier (red square) and surrounding area, during seconds 90-180 of each stimulus period in (D). Bold borders indicate stimuli with responses significantly different from 26°C stimulus (top row) or 40°C stimulus (bottom row) in (E) ( $p < 0.05$ ; repeated-measures ANOVA with Bonferroni correction).

rapid avoidance of heat (Ni et al., 2013). It is also highly conserved among *Drosophila* species (McBride et al., 2007), and has a clear orthologue in *Ae. aegypti*, *AaegGr19* (Ni et al., 2013). A functional role for these thermosensors has never been investigated in the mosquito.

Here we use high-resolution quantitative assays to examine the behavioral strategies underlying mosquito heat-seeking behavior. Our results show that by seeking relative warmth and avoiding both relative cooling and high temperatures, female mosquitoes selectively localize to thermal stimuli that approximate warm-blooded hosts. Using genome editing, we generated mutations in the candidate thermoreceptors, *AaegTRPA1* and *AaegGr19*. We found that *TRPA1* is required for host-selective tuning of mosquito thermotaxis. *AaegTRPA1*<sup>-/-</sup> mutants lack normal avoidance of thermal stimuli ex-

ceeding host body temperatures, resulting in a loss of preference for biologically-relevant thermal stimuli that resemble hosts. This work is important because it identifies a key mechanism by which mosquitoes tune their thermosensory systems toward human body temperatures.

## RESULTS

We previously described an assay to model heat-seeking behavior in the laboratory by monitoring mosquitoes landing on a warmed Peltier element in the context of a cage supplemented with CO<sub>2</sub> (Figure 1A,B) (McMeniman et al., 2014). This assay has the advantages that it is simple in design, produces robust behaviors, and enables the collection of data from large numbers of animals in a short experimental timeframe. Using this system, we can examine mosquito responses to diverse thermal stimuli and measure thermotaxis in different ambient temperature environments. We first needed to determine whether heat-seeking behavior habituates over multiple thermal stimulations. In our heat-seeking assay, *Ae. aegypti* mosquitoes reliably responded to 12 serial presentations of a 40°C stimulus over the course of more than 2.5 hours, with no evidence of habituation (Figure 1—figure supplement 1).

*Ae. aegypti* can feed on a variety of hosts (Clements, 1999; Tandon and Ray, 2000) with core body temperatures ranging from ~37°C (humans) to ~40-43°C (chickens) (Richards, 1971) (Figure 1C). With this in mind, we hypothesized that *Ae. aegypti* mosquitoes should be flexible in their thermotactic targeting to accommodate this wide range of host temperatures. On the other hand, one may also expect mosquito thermotaxis to be sharply tuned to optimize host-seeking by avoiding objects that are too cold or too hot. It is unknown whether there are minimal or maximal temperature thresholds constraining mosquito heat-seeking, and whether responses to thermal stimuli depend on the background ambient temperature.

To investigate these questions, we measured attraction to thermal stimuli produced by heating the Peltier to temperatures ranging from ambient (set to 26°C in these experiments) to 60°C (Figure 1D-E). We found that mosquitoes were highly sensitive to thermal contrast, and are attracted to stimuli 2.5°C above ambient (Figure 1D-F). Furthermore, mosquito occupancy on the Peltier increased with stimulus temperatures up to 40°C. However, for higher-temperature stimuli we observed a dramatic reduction in Peltier occupancy. A 50°C stimulus resulted in approximately half as many animals on the Peltier compared to a 40°C stimulus (Figure 1D-F). Stimuli of 55°C or greater resulted in occupancy rates indistinguishable from an ambient thermal stimulus (26°C) (Figure 1E-F). Spatial analysis of mosquito occupancy on or near the Peltier revealed that while mosquitoes were still attracted to high-temperature stimuli, they populated the area peripheral to the Peltier, and strongly avoided the Peltier itself for stimuli  $\geq 55^\circ\text{C}$  (Figure 1F). This selective thermotaxis is consistent with the natural range of thermal stimuli that mosquitoes encounter during their search for a blood meal from a live host (Figure 1C) (Richards, 1971; Cosgrove and Wood, 1995; Yao et al., 2008).

Female mosquitoes searching for a warm-blooded host may be responding to the absolute temperature of a stimulus or may instead be evaluating relative warmth, defined as the differential between a stimulus and background ambient temperature. To investigate the thermotaxis strategies constituting mosquito heat-seeking behavior, we conducted experiments at three ambient temperatures: 21, 26,

## TRPA1 tunes mosquito thermotaxis to host temperatures

and 31°C (Figure 2A-F). We found that Peltier occupancy for stimuli 21–40°C depended on the differential between the Peltier and ambient temperature (Figure 2B,C), rather than the absolute temperature of the Peltier (Figure 2A). For example, at all ambient temperatures tested, a stimulus 5°C above ambient was sufficient to elicit significant heat-seeking, and elicited approximately half as much Peltier occupancy as a stimulus 10°C above ambient. On the other hand, heat-seeking to targets 50–55°C was inhibited at all ambient temperatures tested (Figure 2D,F), despite the fact that the temperature differential varied widely in these situations (Figure 2E).

These results show that *Ae. aegypti* thermotaxis is driven by seeking relative warmth, but restricted by an absolute upper threshold of ~50–55°C. Because female mosquitoes are attracted to relative warmth, we hypothesized that they may also avoid relative cooling. This complementary behavior would serve to improve host-seeking thermotaxis. We examined mosquito responses to cooling by analyzing the rate at which animals left the Peltier when it cooled at the conclusion of a stimulus period. We found that mosquitoes left the Peltier at similar rates regardless of the absolute temperature of the stimulus (Figure 2G,H, Figure 2—figure supplement 2; based on analysis of data in Figure 1D,E), demonstrating that mosquitoes avoid relative cold during heat-seeking.

Our characterization of *Ae. aegypti* heat-seeking revealed multiple behavioral components contributing to selective thermotaxis during host-seeking: 1) the seeking of relative warmth; 2) the avoidance of relative cooling; and 3) the avoidance of thermal stimuli exceeding host temperature. Each of these sensory-motor functions may rely on the same molecular thermosensors, or may instead use distinct thermosensors. We considered the possibility that thermoreceptors ordinarily dedicated to the behavioral thermoregulation typical of most ectotherms such as *D. melanogaster*, may have evolved a function in host-seeking by mosquitoes and other hematophagous arthropods. Using this reasoning, we generated *AaegTRPA1*<sup>-/-</sup> mutants using zinc-finger nuclease-mediated genome editing (Figure 3A).

In addition to its function as a thermoreceptor, TRPA1 is a highly conserved chemosensor of electrophile irritants such as N-methylmaleimide (Macpherson et al., 2007; Kang et al., 2010). Using a modified capillary feeding (CAFE) assay (Ja et al., 2007) (Figure 3B), we found that wild-type *Ae. aegypti* mosquitoes strongly avoided consumption of N-methylmaleimide (Figure 3C), as well as the bitter compound denatonium benzoate (Figure 3D). *AaegTRPA1*<sup>-/-</sup> mutants rejected denatonium benzoate (Figure 3D), but did not avoid consumption of N-methylmaleimide (Figure 3C). We interpret this result as a loss of N-methylmaleimide detection in *AaegTRPA1*<sup>-/-</sup> mutants, leading to no preference between sucrose and sucrose containing N-methylmaleimide. We note that this simple CAFE assay could be used to discover additional mosquito anti-feedants to repel *Ae. aegypti*, beyond the two chemicals identified here.

Because TRPA1 is important in insect thermoregulation (Hamada et al., 2008), we used a modified thermal gradient assay (Sayeed and Benzer, 1996; Hamada et al., 2008) to assess thermal preference in wild-type and *AaegTRPA1*<sup>-/-</sup> mutant mosquitoes (Figure 3—figure supplement 1A). *AaegTRPA1*<sup>-/-</sup> mutants were impaired in avoidance of high air temperature, leading to significant mortality (Figure 3—figure supplement 1B-F). Together, these data indicate that TRPA1 has a conserved chemosensory and thermosensory function in *Ae. aegypti*.

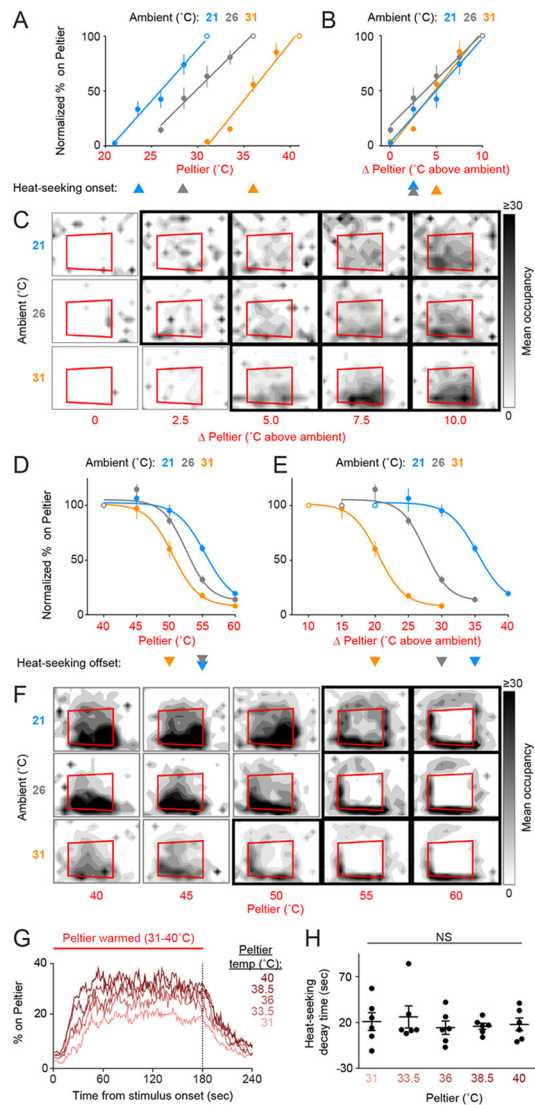

**Figure 2. Mosquitoes thermotax to relative warmth and avoid both relative cooling and stimuli exceeding host body temperature.**

A-F, Heat-seeking at different ambient temperatures ( $n = 5-6$  trials per condition): 21°C (blue), 26°C (gray), 31°C (orange). Data in A, B, D, E are plotted as mean  $\pm$  s.e.m. A, D, Percent of mosquitoes on Peltier during seconds 90-180 of stimuli of indicated temperature, normalized to stimulus 10°C above ambient (A, open circle) or 40°C stimulus (D, open circle). B, E, Same data as in (A, D respectively), plotted using differential between ambient and Peltier temperature. For each ambient temperature, arrowheads indicate the lowest temperature stimulus found to elicit a significant increase in heat-seeking compared to an ambient temperature stimulus (A-B) or a reduction in heat-seeking compared to a 40°C stimulus (D-E) ( $p < 0.05$ ; repeated-measures ANOVA with Bonferroni correction). For each ambient temperature, linear regressions (A-B, 21°C:  $10.6^\circ\text{C}$ ,  $R^2 = 0.98$ , 26°C:  $12^\circ\text{C}$ ,  $R^2 = 0.99$ , 31°C:  $9.5^\circ\text{C}$ ,  $R^2 = 0.97$ ) or variable slope sigmoidal dose-response curves (D-E, 21°C:  $\text{IC}_{50} = 55.4^\circ\text{C}$ ,  $R^2 = 0.87$ , 26°C:  $\text{IC}_{50} = 52.5^\circ\text{C}$ ,  $R^2 = 0.92$ , 31°C:  $\text{IC}_{50} = 50.5^\circ\text{C}$ ,  $R^2 = 0.91$ ) are plotted. C, F, Heat maps showing mean mosquito occupancy on the Peltier (red square) and surrounding area, during seconds 90-180 of each stimulus period. Bold borders indicate stimuli with responses significantly different from an ambient-temperature stimulus (C) in (A-B), or significantly different from a 40°C stimulus (F) in (D-E) ( $p < 0.05$ ; repeated-measures ANOVA with Bonferroni correction). G, H, Analysis of mosquito responses to cooling from data in (Figure 1D). G, Mean percent of mosquitoes on Peltier during thermal stimuli 31–40°C. Dashed line indicates the end of the stimulus period. H, Post-stimulus time at which the percent of mosquitoes on Peltier has decayed to one half of the mean during seconds 90-180 of the stimulus period from (Figure 1E). Each replicate is indicated by a dot, mean  $\pm$  s.e.m. by lines (NS, not significant; one-way ANOVA with Bonferroni correction).



*TRPA1* tunes mosquito thermotaxis to host temperatures

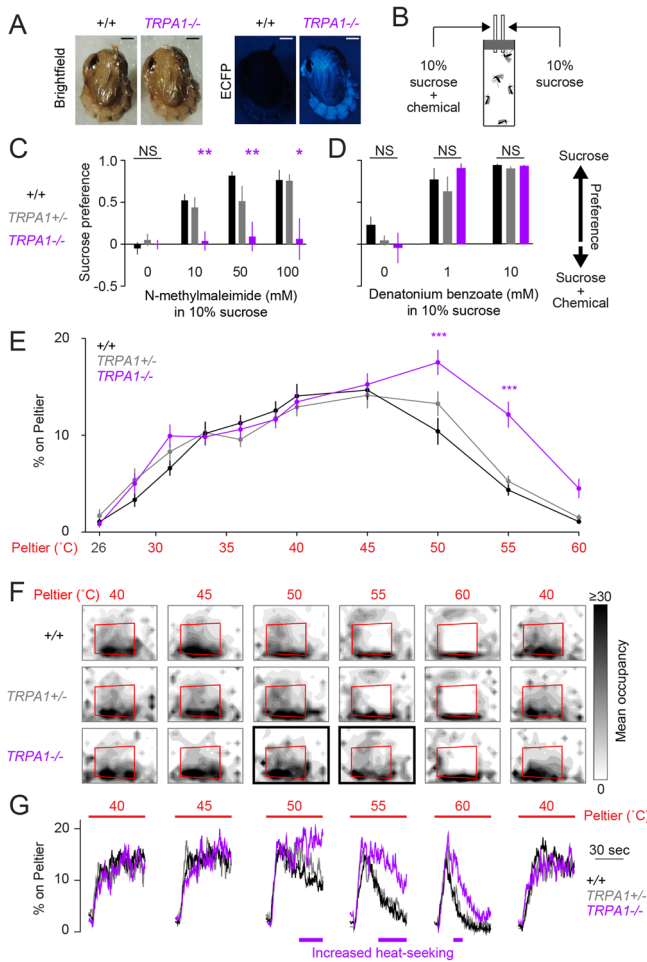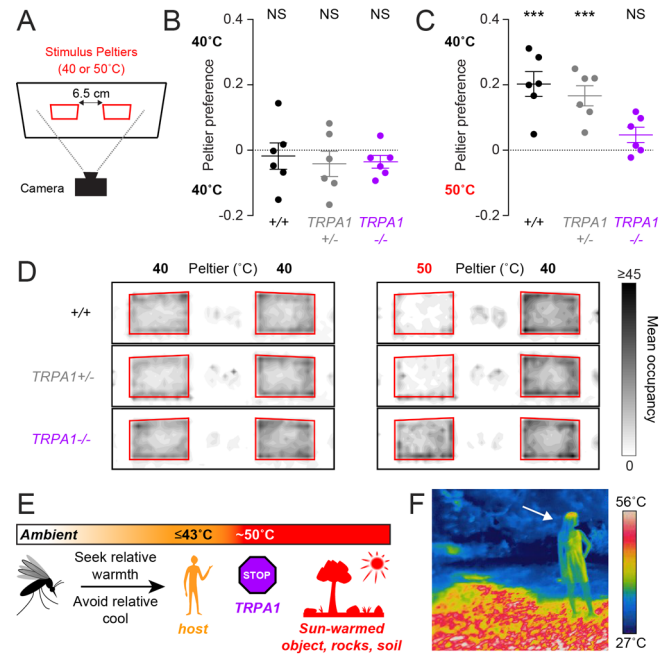

**Figure 3. *AegTRPA1*<sup>-/-</sup> mutants fail to avoid a chemical irritant and high-temperature stimuli.**

A, Representative bright field (left) and fluorescence (right) images of wild-type and *AegTRPA1*<sup>-/-</sup> female pupae marked by ubiquitous expression of enhanced cyan fluorescent protein (ECFP). Scale bars: 0.5 mm. B, Schematic of capillary feeding (CAFE) assay. C-D, Sucrose preference over sucrose containing the indicated concentration of N-methylmaleimide (C, n = 10-12 trials per condition) or denatonium benzoate (D, n = 7 trials per condition) for mosquitoes of the indicated genotypes (NS, not significant; \*p < 0.05, \*\*p < 0.01; one-way ANOVA with Bonferroni correction compared to wild-type). E, Percent of mosquitoes of indicated genotypes on Peltier during seconds 90-180 of stimuli of indicated temperature (mean ± s.e.m., n = 6-9 trials per genotype; \*\*\*p < 0.001; repeated measures one-way ANOVA with Bonferroni correction). F, Heat maps showing mean mosquito occupancy for the indicated genotypes on the Peltier (red square) and surrounding area, during seconds 90-180 of each stimulus period. Bold borders indicate stimuli with responses significantly different from wild-type in (E) (p < 0.05; repeated-measures ANOVA with Bonferroni correction). G, Mean percent of mosquitoes of indicated genotypes on Peltier during thermal stimuli 40-60°C and during subsequent re-presentation of 40°C. Timespans with statistically significant increases in *AegTRPA1*<sup>-/-</sup> mutant Peltier occupancy compared to wild-type are indicated by purple lines (calculated from 15 second bins; p < 0.05; one-way ANOVA with Bonferroni correction).

**Figure 4. *AegTRPA1*<sup>-/-</sup> mutants fail to discriminate between host-temperature and higher-temperature targets.**

A, Schematic of heat-seeking choice assay. B-C, Preference for 40°C versus 40°C (B) or 50°C versus 40°C (C) Peltiers for indicated genotypes (n = 6 trials per genotype; mean ± s.e.m., with each replicate indicated by a dot; NS, not significant; \*\*\*p < 0.001; one sample t-test versus zero preference). In (C) *AegTRPA1*<sup>-/-</sup> mutants are significantly different from wild-type and heterozygous mutants (p < 0.05, one-way ANOVA with Bonferroni correction). D, Heat maps showing mean mosquito occupancy for the indicated genotypes on Peltiers (red squares) of the indicated temperatures and surrounding area, during seconds 60-240 of each stimulus period. E, Model of mosquito thermotaxis. F, Thermal image of a person (arrow) standing on a sunlit patch of grass in Central Park in New York City.

## *TRPA1* tunes mosquito thermotaxis to host temperatures

We next asked if *AeegTRPA1* is required for mosquito heat-seeking behavior. *AeegTRPA1*<sup>-/-</sup> mutants showed normal attraction to stimuli at or below 45°C, but strikingly lacked normal avoidance of higher-temperature stimuli (50°C and 55°C) (Figure 3E,F). A detailed analysis of Peltier occupancy over time revealed that *AeegTRPA1*<sup>-/-</sup> mutants persisted on the Peltier during 50, 55 and 60°C stimulus presentations, whereas control animals rapidly left these high-temperature stimuli (Figure 3G). Therefore, *AeegTRPA1* is required for normal avoidance of high-temperature stimuli that exceed host body temperature. Because *AeegTRPA1*<sup>-/-</sup> mutants retained attraction to warm stimuli, we used targeted mutagenesis to test a requirement for *AeegGr19*, the *Ae. aegypti* orthologue of *Gr28b*, in heat-seeking (Figure 3—figure supplement 2A). Although this thermosensor is required for mediating rapid avoidance of warmth in *D. melanogaster* (Ni et al., 2013), *AeegGr19*<sup>-/-</sup> mutant mosquitoes showed no thermotaxis defects (Figure 3—figure supplement 2B).

While *AeegTRPA1*<sup>-/-</sup> mutants did not show normal avoidance of high-temperature stimuli, they may still prefer host-temperature stimuli if presented with a choice. Using a heat-seeking choice assay with two independently controlled Peltiers, we examined the importance of *AeegTRPA1* in guiding mosquito thermotaxis in a more complex thermal landscape (Figure 4A). In this assay, mosquitoes are simultaneously presented with two thermal stimuli. When presented with two 40°C stimuli, both wild-type and mutant mosquitoes distributed equally between the Peltiers (Figure 4B), but in a choice between a 40°C and 50°C stimulus, wild-type mosquitoes strongly preferred the 40°C Peltier (Figure 4C) and avoided the 50°C Peltier (Figure 4D). Remarkably, in this choice scenario, *AeegTRPA1*<sup>-/-</sup> mutants failed to avoid the 50°C Peltier, resulting in no preference for the 40°C stimulus (Figure 4C,D, Video 1). These results demonstrate that *AeegTRPA1* is required for mosquitoes to discriminate body temperatures from higher temperature stimuli, thereby tuning mosquito heat-seeking towards the temperature range of warm-blooded hosts.

## DISCUSSION

We have elucidated the basic thermotaxis strategies used by host-seeking mosquitoes, and revealed an important role for *TRPA1* in regulating this behavior (Figure 4E). Using a quantitative thermotaxis assay, we modelled *Ae. aegypti* heat-seeking behavior in the laboratory. We found that mosquitoes can search for hosts in a wide range of ambient temperatures by seeking relative warmth and avoiding relative cold. Remarkably, these animals can detect a stimulus with thermal contrast as small as 2.5°C. In an outdoor environment, however, hosts are often warmer than the surrounding air but cooler than sun-warmed soil, rocks, trees, and human-made objects (Figure 4F). For this reason, diurnal mosquitoes such as *Ae. aegypti* are poorly served by merely thermotaxing to the hottest object available. A more optimal strategy is to search specifically for biologically relevant stimuli, and to avoid thermal stimuli exceeding host temperature, as we have observed in our laboratory models of heat-seeking. Acquiring a blood meal is an essential component of reproduction for a female *Ae. aegypti* mosquito. To maximize her chances of finding a blood meal, a female mosquito should reject “distracting” stimuli that exceed host temperatures. Our results demonstrate that *AeegTRPA1* is critical for this selective thermotaxis.

Mosquito heat-seeking behavior represents an excellent model system for further study of the genetics (Kang et al., 2012; Zhong et al., 2012),

neuroscience (Frank et al., 2015; Liu et al., 2015), and decision-making (Luo et al., 2010) underlying thermosensation and thermotaxis. Until now, mechanistic studies of thermosensation have been restricted to traditional laboratory model organisms, such as domestic mice and *Drosophila melanogaster* flies, whose thermotaxis consists mainly of moving away from suboptimal thermal environments. Mosquitoes too, must undergo such behavioral thermoregulation, as we have found in our thermal gradient assay. However, their repertoire of thermotactic behaviors is expanded by the evolution of a specialized and highly tuned mode of thermotaxis to locate warm-blooded hosts. It will be interesting to investigate the neural mechanisms that regulate the divergent behavioral choices of thermoregulation and heat-seeking. We propose that these systems may be in behavioral conflict during mosquito host-seeking.

Our work identifies *TRPA1* as a gene regulating mosquito avoidance of high-temperature stimuli, which we have shown to be a major behavioral component of heat-seeking. However, because both *AeegTRPA1*<sup>-/-</sup> and *AeegGr19*<sup>-/-</sup> mutants retain normal attraction to warmth, this aspect of heat-seeking must rely on other thermoreceptors, still to be identified. Our study shows that this attraction must be mediated either by a single thermosensor that adapts to background temperature, or multiple thermosensors each tuned to a distinct absolute threshold. Understanding the behavioral and molecular basis of thermotaxis in mosquitoes and other disease vectors (Flores and Lazzari, 1996; Schmitz et al., 2000) is of great biomedical importance. *Ae. aegypti* mosquitoes are potent vectors of yellow fever, chikungunya, and dengue arboviruses, resulting annually in hundreds of millions of infections (Bhatt et al., 2013). Further study of mosquito heat-seeking behavior may aid in the design of next-generation traps, repellents, and control strategies.

## MATERIALS AND METHODS

### Mosquito rearing and maintenance

*Ae. aegypti* wild-type (Orlando), *AeegGr19*, and *AeegTRPA1* mutant strains were maintained and reared at 25-28°C, 70-80% relative humidity with a photoperiod of 14 hr light:10 hr dark (lights on at 8 a.m.) as previously described (DeGennaro et al., 2013). Adult mosquitoes were provided constant access to 10% sucrose solution for feeding, and females were provided with a blood source for egg production, either live mice or human volunteers. Blood-feeding procedures were approved and monitored by The Rockefeller University Institutional Animal Care and Use Committee and Institutional Review Board, protocols 14756 and LV-0652 respectively. Human volunteers gave their informed written consent to participate in mosquito blood-feeding procedures. Before behavioral assays, mosquitoes were sexed and sorted under cold anesthesia (4°C) and fasted for 15-24 hours in the presence of a water source.

### ZFN-mediated targeted mutagenesis

Molecular Biology:

PCR was carried out using Novagen KOD polymerase (EMD Millipore, Billerica, MA), products were cloned using pCR4-TOPO (Invitrogen), and Sanger sequenced by Genewiz (South Plainfield, NJ).

ZFN Design:

ZFNs targeting *AeegTRPA1* or *AeegGr19* (VectorBase Accession numbers AAEL009419 and AAEL011073, respectively) were designed and produced by the CompoZr Custom ZFN Service (Sigma-Aldrich, St. Louis, MO). The nucleotide sequences of the ZFN-binding sites (upper case) and nonspecific cut site for wild-type heterodimeric Fok1 endonuclease (lower case) are:

## TRPA1 tunes mosquito thermotaxis to host temperatures

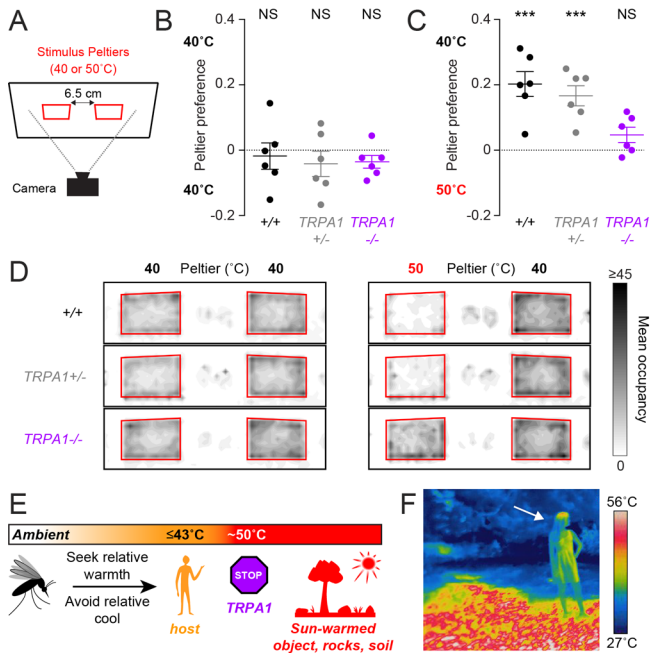

**Figure 4. *AegTRPA1*<sup>-/-</sup> mutants fail to discriminate between host-temperature and higher-temperature targets.**

A, Schematic of heat-seeking choice assay. B-C, Preference for 40°C versus 40°C (B) or 50°C versus 40°C (C) Peltiers for indicated genotypes (n = 6 trials per genotype; mean ± s.e.m., with each replicate indicated by a dot; NS, not significant; \*\*\*p < 0.001; one sample t-test versus zero preference). In (C) *AegTRPA1*<sup>-/-</sup> mutants are significantly different from wild-type and heterozygous mutants (p < 0.05, one-way ANOVA with Bonferroni correction). D, Heat maps showing mean mosquito occupancy for the indicated genotypes on Peltiers (red squares) of the indicated temperatures and surrounding area, during seconds 60-240 of each stimulus period. E, Model of mosquito thermotaxis. F, Thermal image of a person (arrow) standing on a sunlit patch of grass in Central Park in New York City.

### AegTRPA1:

5'- GTCGTTTTTCGTCCATACCgatgtcGTTGCTTAGGACGTT-3'.

### AegGr19:

5'-ACCAACCTTTCACTGCaaatgacCCACCGAAAGTGGCA-3'.

### Homologous Recombination Design:

Donor plasmids were generated as previously described (McMeniman et al., 2014). All donor plasmids included homologous arms cloned from wild-type genomic DNA, and consisting of sequence flanking or partially overlapping the ZFN recognition sites.

*AegTRPA1* was targeted using pSL1180-HR-PUBecFP-TRPA1. The left homologous arm (1608 bp, primers: forward, 5'-GCATGCATGGGTAACAAGAAGGGTTGT-3' and reverse, 5'-CGACAAGTGGTTTACTTGTGTGCAATC-3') and right homologous arm (3037 bp, primers: forward, 5'-CGTTTTCCATGATGCTCGGC-3' and reverse, 5'-CGAAGACCAACGCGATGTAGTTCCA-3') were cloned into the EcoRI and NotI sites of pSL1180-HR-PUBecFP (Addgene #47917), respectively. *AegGr19* was targeted using pSL1180-HR-PUBdsRED-Gr19. The left homologous arm (1257 bp, primers: forward, 5'-AGGTATGCCTG-GATTGGACGTAAGAAA-3' and reverse, 5'-GCAGTGAAAGGTTGGT-TAACTG-3') and right homologous arm (1203 bp, primers: forward, 5'-CCACCGAAAGTGGCATTACC GC-3' and reverse, 5'-GCGACG-GTCCCTTGCGATGTCGTTAT-3') were cloned into the XmaI and NotI sites of pSL1180-HR-PUBdsRED (Addgene #49327), respectively.

Generation of Mutant Lines: To generate *AegTRPA1* homologous recombination mutant alleles, 2000 pre-blastoderm stage wild-type embryos were microinjected (Genetic Services Inc., Cambridge, MA) with *AegTRPA1* ZFN mRNA (200 ng/μl) and pSL1180-HR-PUBecFP-TRPA1 (750 ng/μl). To generate *AegGr19* homologous recombination mutant alleles, 1000 pre-blastoderm stage wild-type embryos were microinjected (IBBR Insect Transformation Facility, Rockville, MD) with *AegGr19* ZFN mRNA (200 ng/μl) and pSL1180-HR-PUBdsRED-Gr19 (700 ng/μl). Injected G0 animals were crossed to wild-type in multiple batches to generate G1 lines with independent ZFN mutagenesis events. G1 homologous recombination mutant individuals were recovered via fluorescence as previously described (McMeniman et al., 2014), and outcrossed separately to wild-type for 5 generations before establishing four independent homozygous lines: *AegTRPA1*ECFP-1, *AegTRPA1*ECFP-2, *AegGr19*dsRED-1, and *AegGr19*dsRED-2. To confirm directed insertion of the PUBecFPnls-SV40 cassette into the *AegTRPA1* locus, a diagnostic PCR product (no wild-type band, 2075 bp mutant band) was amplified using a forward primer anchored outside the boundary of the left homologous arm (5'-CATGGACAATTTGGC-GTAGGCAGTAT-3') and an ECFP reverse primer anchored inside the inserted cassette (5'-AGATCTCGACCCAAGAAAAGCGGAAG-3'). To establish homozygous *AegTRPA1*<sup>-/-</sup> lines, a diagnostic PCR product (679 bp wild-type band, 3305 bp mutant band) spanning the ZFN cut-site was amplified using primers: forward, 5'-GGTTTCAAGGATGATTGACACACAAG-3', and reverse, 5'-GCAGAGCTGATTTCTCGTAGTTTTCG-3'. To confirm directed insertion of the PUBdsRED-SV40 cassette into the *AegGr19* locus, a diagnostic PCR product (6362 bp wild-type band, 8787 bp mutant band) was amplified using primers anchored outside the boundaries of both homologous arms: forward, 5'-AGCTGATCAACGTTAACAACACTACGATG-3', and reverse, 5'-AGAGCATGGTGTAACCTTGACAGCTCAA-3'. The following lines were used for all experiments: *AegTRPA1*ECFP-1/ECFP-2, *AegTRPA1*ECFP-1/+, *AegGr19*dsRED-1/dsRED-2, *AegGr19*dsRED-1/+. Heteroallelic mutants were used to minimize fitness effects that might be present in homozygous mutants.

### Behavior

All assays were carried out during the hours of ZT2-ZT12 at 26°C and 70-80% relative humidity unless stated otherwise. Whenever possible, time of day was randomized across conditions. All mosquitoes used were 10-21 day-old females, age-matched across conditions and genotypes. Heat-seeking:

Assays were performed as previously described (McMeniman et al., 2014), in a 30 x 30 x 30 cm Plexiglas enclosure. All stimulus periods lasted 3 minutes, and were presented on a single Peltier element (6 x 9 cm) covered with a piece of standard white letter size printer paper (extra bright, Navigator; Office Depot/Office Max, Cleveland, OH) cut to 15 x 17 cm and held taut by a magnetic frame. CO<sub>2</sub> pulses (20 sec) accompanied all stimulus period onsets. A second identical control Peltier element was situated on the wall opposite to the stimulus Peltier, and was set to ambient temperature during all experiments. Peltier temperature set-point is reported throughout the paper. Measurements of Peltier temperature via a thermocouple embedded in the Peltier element are reported in Figure 1D, Figure 1—figure supplement 1A and Figure 2—figure supplement 1. For each trial, 45-50 mosquitoes were introduced into the assay, and only mosquitoes directly on the Peltier area (Figure 1B) during seconds 90-180 of stimulus periods were scored. Heat maps are smoothed 2D histograms of mean mosquito occupancy during seconds 90-180 of stimulus periods, sampled at 1 Hz and binned into 12 x 16 image sectors. Heat-seeking choice: The assay was modified from the heat-seeking



## TRPA1 tunes mosquito thermotaxis to host temperatures

assay described above. For each trial, 45-50 mosquitoes were introduced into a custom-made Plexiglas box (38.5 x 28 x 12.5 cm) with two Peltier elements (4.6 x 6.5 cm surface area, ATP-O40-12, Custom ThermoElectric, Bishopville, MD) each covered with a taut piece of standard white letter size printer paper (extra bright, Navigator) cut to 9 x 11 cm. The Peltier elements were mounted on a single wall, 3.5 cm above the floor, 8.5 cm from either edge of the enclosure, and adjacent to one another separated by 6.5 cm. Mosquitoes were allowed to acclimate for 10 minutes, at which point the Peltier elements were both warmed to 40°C. After fully warming the Peltier elements for 60 seconds, a CO<sub>2</sub> pulse (20 sec) was added to the airstream and the Peltier elements were kept at 40°C for a 4-minute stimulus period at which point they were returned to ambient temperature (26°C). After a 12-minute interstimulus period, the stimulus was repeated, this time with the left Peltier element warmed to 50°C while the right Peltier element was warmed to 40°C. A camera (Point Grey Research, Richmond, BC, Canada) was used to measure mosquito landings, and only mosquitoes directly on either Peltier area (Figure 4H) during seconds 60-240 of stimulus periods were scored. Preference was calculated by subtracting the proportion of total mosquitoes on the left Peltier (40 or 50°C) from the proportion of total mosquitoes on the right Peltier (40°C). Heat maps are smoothed 2D histograms of mean mosquito occupancy during seconds 60-240 of stimulus periods, sampled at 1 Hz and binned into 15 x 52 image sectors. Capillary feeder (CAFE):

This assay was adapted for the mosquito from the original assay developed for *Drosophila* (Ja et al., 2007) For each trial, 5 mosquitoes were fasted with access to water for 24 hours, and placed in a polypropylene vial (#89092-742, VWR, Radnor, PA) with access to two 5 µl calibrated glass capillaries (#53432-706, VWR) containing 10 % (w : v) sucrose with 5 % (v : v) green McCormick brand food dye. Capillaries spaced ~0.5 cm apart traversed the cotton plug (#49-101, Genesee Scientific, San Diego, CA) of the vial and protruded into the vial < 1 mm to provide a flush surface for mosquitoes to access the liquid while resting on the plug surface. The control capillary contained only green sucrose solution, and the experimental capillary contained green sucrose solution supplemented with 0, 1, or 10 mM of denatonium benzoate (Sigma-Aldrich) or 0, 10, 50, or 100 mM of N-methylmaleimide (Sigma-Aldrich). The experimental capillary with 0 mM chemical was identical to the control capillary, and served as a zero-choice to test for side-bias in the assay. Because a small amount of liquid evaporated during preparation of the capillaries, all choice conditions and genotypes were prepared in a time-staggered format so that any measurement error due to evaporation was spread across the conditions. The levels of remaining liquid in both capillaries were measured after 18-20 hours and were compared to the known initial liquid level. Experiments started at ZT 8-10 and ended at ZT 4-6 the following day. Consumption values were compared to control capillaries in vials without mosquitoes to account for evaporation. We note that in cases where mosquitoes did not feed from a capillary and all liquid loss was due to evaporation, consumption values could be calculated to be negative due to very small variation in evaporation rates between experimental and control capillaries. Any negative consumption values were rounded to zero. Sucrose preference was calculated by dividing the amount consumed from the control capillary (not containing denatonium benzoate or N-methylmaleimide) by the total amount consumed from both capillaries. In experiments with 0 mM denatonium benzoate or 0 mM N-methylmaleimide, one capillary was arbitrarily chosen as "sucrose only." Thermal gradient:

This assay was adapted from one developed for *Drosophila* (Sayeed and Benzer, 1996; Hamada et al., 2008). A custom-built enclosure (6

mm tall) was affixed to an aluminum thermal gradient bar (50 x 30.5 cm, TGB-5030, ThermoElectric Cooling America Corp., Chicago, IL) driven by two Peltier Elements (AHP-1200CPV, ThermoElectric Cooling America Corp.). The enclosure was separated lengthwise into 4 lanes (each 50 x 6 cm) that were visually isolated from one another. Three lanes were for testing mosquito thermal preference, while the fourth lane was dedicated to measuring air temperature via an array of 8 digital temperature sensors (DS18B20, Maxim, San Jose, CA; connected to an Arduino Uno, <https://www.arduino.cc/>) mounted to the top of the enclosure and distributed evenly across the length of the lane and centered in each analysis sector. An overhead camera (C910, Logitech, Lausanne, Switzerland) monitored mosquito position through the transparent lid of the enclosure. Images were acquired once per minute and analyzed using custom MATLAB scripts to count mosquitoes across 8 analysis sectors of the lane. The assay was conducted in a room maintained at 80-90% relative humidity and 14°C to achieve low air temperatures within the gradient enclosure. At the beginning of each 3-hour trial, the air temperature throughout the enclosure was stabilized at ~26°C, and 25-30 mosquitoes were introduced into each lane of the assay. After 90 minutes, a thermal gradient was established (air temperatures: ~19°C to ~36°C) by heating the right Peltier element and cooling the left Peltier element. Mosquitoes were monitored for an additional 90 minutes while exposed to this thermal gradient. Mosquito distributions during minutes 60-90 were monitored in both the "no thermal gradient" and "thermal gradient" conditions. Dead mosquitoes were visually identified at the conclusion of each trial. All genotypes were tested in parallel, and their lane positions were randomized across trials.

### Thermal images

All thermal images were acquired with an infrared camera (E60, FLIR Systems, Wilsonville, OR).

### Statistical analysis

All statistical analyses were performed using Prism 5 software (Graph-Pad Software, Inc., La Jolla, CA).

### ACKNOWLEDGMENTS

We thank Kevin Lee, Conor McMeniman, and members of the Voss-hall Lab for discussions and comments on the manuscript; Nilay Yapici for advice, and Sarah-Yeoh Wang for assistance with the CAFE experiments in Figure 3B-D; Gloria Gordon for expert mosquito rearing; Conor J. McMeniman for early work on the characterization of the AegTRPA1 locus and Benjamin J. Matthews for AegGr19 RNA-seq analysis, both of which guided ZFN design; Lina Ni and Paul Garrity for valuable advice on the gradient assay in Extended Data Figure 4; and Marco Gallio, Charles Zuker, and Paul Garrity for sharing unpublished information about *Drosophila* thermosensors prior to publication. This study was supported in part by a grant from the NIH CTSA program (NCATS UL1 TR000043). L.B.V. is an investigator of the Howard Hughes Medical Institute.

### AUTHOR CONTRIBUTIONS

R.A.C. designed and carried out all experiments in the study. R.A.C. and L.B.V. together interpreted the results, designed the figures, and wrote the paper. The authors declare no competing financial interests..

### REFERENCES

Barbagallo, B., and Garrity, P.A. 2015. Temperature sensation in *Drosophila*. *Current Opinion in Neurobiology* 34, 8-13. doi: <http://dx.doi.org/10.1016/j.conb.2015.01.002>.

## TRPA1 tunes mosquito thermotaxis to host temperatures

- Bhatt, S., Gething, P.W., Brady, O.J., Messina, J.P., Farlow, A.W., Moyes, C.L., Drake, J.M., Brownstein, J.S., Hoen, A.G., Sankoh, O., et al. 2013. The global distribution and burden of dengue. *Nature* 496, 504-507. doi: <http://dx.doi.org/10.1038/nature12060>.
- Cardé, R.T. 2015. Multi-cue integration: how female mosquitoes locate a human host. *Current Biology* 25, R793-795. doi: <http://dx.doi.org/10.1016/j.cub.2015.07.057>.
- Clements, A.N. 1999. *The Biology of Mosquitoes: Sensory reception and behaviour* (Oxfordshire: CAB).
- Cosgrove, J.B., and Wood, R.J. 1995. Probing and gorging responses of three mosquito species to a membrane feeding system at a range of temperatures. *Journal of the American Mosquito Control Association* 11, 339-342. doi: <http://dx.doi.org/10.1016/j.cub.2008.01.060>.
- DeGennaro, M., McBride, C.S., Seeholzer, L., Nakagawa, T., Dennis, E.J., Goldman, C., Jasinskiene, N., James, A.A., and Vosshall, L.B. 2013. orco mutant mosquitoes lose strong preference for humans and are not repelled by volatile DEET. *Nature* 498, 487-491. doi: <http://dx.doi.org/10.1038/nature12206>.
- Dekker, T., Geier, M., and Cardé, R.T. 2005. Carbon dioxide instantly sensitizes female yellow fever mosquitoes to human skin odours. *Journal of Experimental Biology* 208, 2963-2972. doi: <http://dx.doi.org/10.1242/jeb.01736>.
- Eiras, A.E., and Jepson, P.C. 1991. Host location by *Aedes aegypti* (Diptera: Culicidae): a wind tunnel study of chemical cues. *Bulletin of Entomological Research* 81, 151-160. doi: <http://dx.doi.org/10.1017/S0007485300051221>.
- Eiras, A.E., and Jepson, P.C. 1994. Responses of female *Aedes aegypti* (Diptera: Culicidae) to host odours and convection currents using an olfactometer bioassay. *Bulletin of Entomological Research* 84, 207-211. doi: <http://dx.doi.org/10.1017/S0007485300039705>.
- Flores, G.B., and Lazzari, C.R. 1996. The role of the antennae in *Triatoma infestans*: orientation towards thermal sources. *Journal of Insect Physiology* 42, 433-440. doi: [http://dx.doi.org/10.1016/0022-1910\(95\)00137-9](http://dx.doi.org/10.1016/0022-1910(95)00137-9).
- Frank, D.D., Jouandet, G.C., Kearney, P.J., Macpherson, L.J., and Gallio, M. 2015. Temperature representation in the *Drosophila* brain. *Nature* 519, 358-361. doi: <http://dx.doi.org/10.1038/nature14284>.
- Gingl, E., Hinterwirth, A., and Tichy, H. 2005. Sensory representation of temperature in mosquito warm and cold cells. *Journal of Neurophysiology* 94, 176-185. doi: <http://dx.doi.org/10.1152/jn.01164.2004>.
- Gracheva, E.O., Cordero-Morales, J.F., González-Carcacia, J.A., Ingholia, N.T., Manno, C., Aranguren, C.I., Weissman, J.S., and Julius, D. 2011. Ganglion-specific splicing of TRPV1 underlies infrared sensation in vampire bats. *Nature* 476, 88-91. doi: <http://dx.doi.org/10.1038/nature10245>.
- Gracheva, E.O., Ingholia, N.T., Kelly, Y.M., Cordero-Morales, J.F., Hollopeter, G., Chesler, A.T., Sánchez, E.E., Perez, J.C., Weissman, J.S., and Julius, D. 2010. Molecular basis of infrared detection by snakes. *Nature* 464, 1006-1011. doi: <http://dx.doi.org/10.1038/nature08943>.
- Hamada, F.N., Rosenzweig, M., Kang, K., Pulver, S.R., Ghezzi, A., Jegla, T.J., and Garrity, P.A. 2008. An internal thermal sensor controlling temperature preference in *Drosophila*. *Nature* 454, 217-220. doi: <http://dx.doi.org/10.1038/nature07001>.
- Hedgecock, E.M., and Russell, R.L. 1975. Normal and mutant thermotaxis in the nematode *Caenorhabditis elegans*. *Proceedings of the National Academy of Sciences of the United States of America* 72, 4061-4065. doi: <http://dx.doi.org/10.1073/pnas.72.10.4061>.
- Howlett, F.M. 1910. The influence of temperature upon the biting of mosquitoes. *Parasitology* 3, 479-484. doi: <http://dx.doi.org/10.1017/S0031182000002304>.
- Ja, W.W., Carvalho, G.B., Mak, E.M., de la Rosa, N.N., Fang, A.Y., Liong, J.C., Brummel, T., and Benzer, S. 2007. Prandiology of *Drosophila* and the CAFE assay. *Proceedings of the National Academy of Sciences of the United States of America* 104, 8253-8256. doi: <http://dx.doi.org/10.1073/pnas.0702726104>.
- Kang, K., Panzano, V.C., Chang, E.C., Ni, L., Dainis, A.M., Jenkins, A.M., Regna, K., Muskavitch, M.A.T., and Garrity, P.A. 2012. Modulation of TRPA1 thermal sensitivity enables sensory discrimination in *Drosophila*. *Nature* 481, 76-80. doi: <http://dx.doi.org/10.1038/nature10715>.
- Kang, K., Pulver, S.R., Panzano, V.C., Chang, E.C., Griffith, L.C., Theobald, D.L., and Garrity, P.A. 2010. Analysis of *Drosophila* TRPA1 reveals an ancient origin for human chemical nociception. *Nature* 464, 597-600. doi: <http://dx.doi.org/10.1038/nature08848>.
- Kröber, T., Kessler, S., Frei, J., Bourquin, M., and Guerin, P.M. 2010. An in vitro assay for testing mosquito repellents employing a warm body and carbon dioxide as a behavioral activator. *Journal of the American Mosquito Control Association* 26, 381-386. doi: <http://dx.doi.org/10.2987/10-6044.1>.
- Lees, A.D. 1948. The sensory physiology of the sheep tick, *Ixodes ricinus* L. *Journal of Experimental Biology* 25, 145-207. doi: <http://dx.doi.org/10.1017/S0007485300039705>.
- Liu, W.W., Mazor, O., and Wilson, R.I. 2015. Thermosensory processing in the *Drosophila* brain. *Nature* 519, 353-357. doi: <http://dx.doi.org/10.1038/nature14170>.
- Luo, L., Gershow, M., Rosenzweig, M., Kang, K., Fang-Yen, C., Garrity, P.A., and Samuel, A.D.T. 2010. Navigational decision making in *Drosophila* thermotaxis. *Journal of Neuroscience* 30, 4261-4272. doi: <http://dx.doi.org/10.1523/JNEUROSCI.4090-09.2010>.
- Macpherson, L.J., Dubin, A.E., Evans, M.J., Marr, F., Schultz, P.G., Cravatt, B.F., and Patapoutian, A. 2007. Noxious compounds activate TRPA1 ion channels through covalent modification of cysteines. *Nature* 445, 541-545. doi: <http://dx.doi.org/10.1038/nature05444>.
- Maekawa, E., Aonuma, H., Nelson, B., Yoshimura, A., Tokunaga, F., Fukumoto, S., and Kanuka, H. 2011. The role of proboscis of the malaria vector mosquito *Anopheles stephensi* in host-seeking behavior. *Parasites & Vectors* 4, 10. doi: <http://dx.doi.org/10.1186/1756-3305-4-10>.





## TRPA1 tunes mosquito thermotaxis to host temperatures

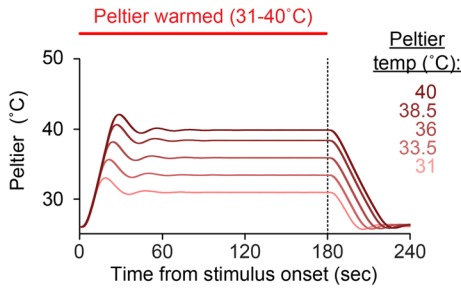

**Figure 2—figure supplement 1. Dynamics of Peltier temperature during stimulus periods.**

Mean Peltier temperature measured by thermocouple during presentation of thermal stimuli (31-40°C). Dashed line indicates the end of the stimulus period.

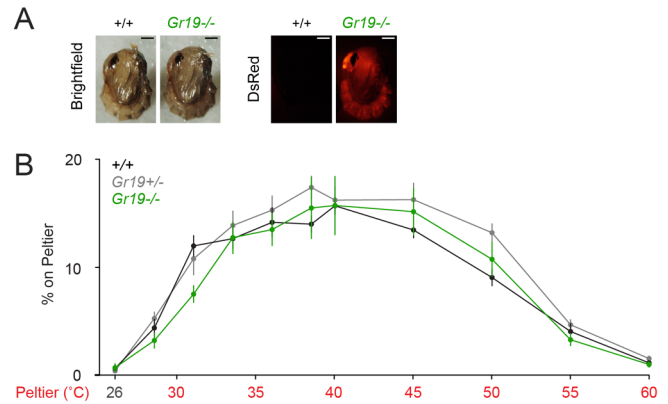

**Figure 3—figure supplement 2. *AaegGr19<sup>-/-</sup>* mutants show normal thermo-taxis.**

A, Representative bright field (left) and fluorescence (right) images of wild-type and *AaegGr19<sup>-/-</sup>* female pupae marked with ubiquitous expression of *Disco* sp. red fluorescent protein (DsRed). Scale bars: 0.5 mm. The wild-type bright-field image is duplicated from (Figure 3A). B, Percent of mosquitoes of indicated genotypes on Peltier during seconds 90-180 of stimuli of indicated temperature (mean  $\pm$  s.e.m.,  $n = 6-9$  trials per genotype). Neither *AaegGr19<sup>-/-</sup>* nor *AaegGr19<sup>+/-</sup>* were significantly different from wild-type at any stimulus temperature (repeated measures one-way ANOVA with Bonferroni correction).

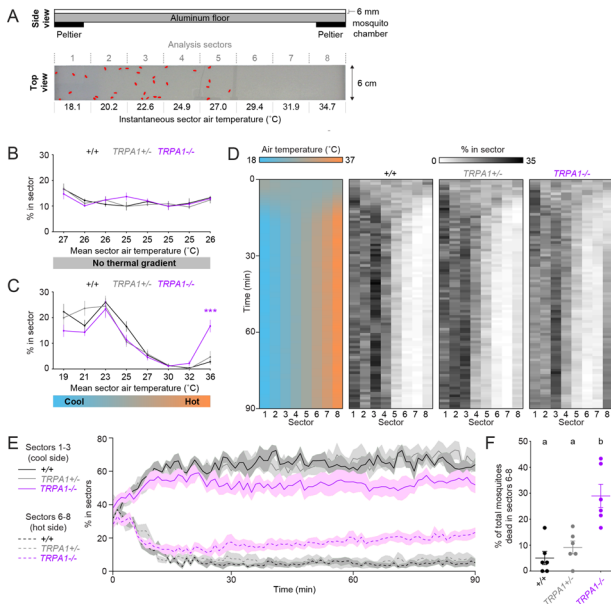

**Figure 3—figure supplement 1. *AaegTRPA1<sup>-/-</sup>* mutants fail to avoid noxious heat in a thermal gradient.**

A, Schematic of the thermal gradient assay (top, side view). Representative experimental image (bottom, top view) showing mosquitoes outlined in red detected across one lane of the thermal gradient assay, with instantaneous air temperature reported for each of 8 analysis sectors. B-C, Percent of mosquitoes of indicated genotypes detected in each sector and mean sector air temperature (rounded to nearest °C) in the absence (B) or presence (C) of a thermal gradient ( $n = 6$  trials per genotype). Data are plotted as mean  $\pm$  s.e.m. (\*\*\*)  $p < 0.001$ ; two-way ANOVA with Bonferroni correction compared to wild-type). D, Heat maps showing mean air temperature (left) and percent of mosquitoes of the indicated genotypes detected (right) in each sector over 90 minutes from the onset of a thermal gradient. E, Same data as in (D), showing total percent of mosquitoes of the indicated genotypes detected in sectors 6-8 (hot side, dotted line, mean; s.e.m., shading) during onset and maintenance of a thermal gradient. F, Percent of total mosquitoes of the indicated genotypes found dead in sectors 6-8 at the conclusion of the experiment. Each replicate is indicated by a dot, and mean  $\pm$  s.e.m. by lines. Genotypes with different letters are significantly different ( $p < 0.01$ , one-way ANOVA with Bonferroni correction).
